# Supplementary material
Source: PubMed Central journal article supplement (PMC4593932)
Supplement: Supp_Figure1.pdf [file Supp_Figure1.pdf]

## Supplementary Data

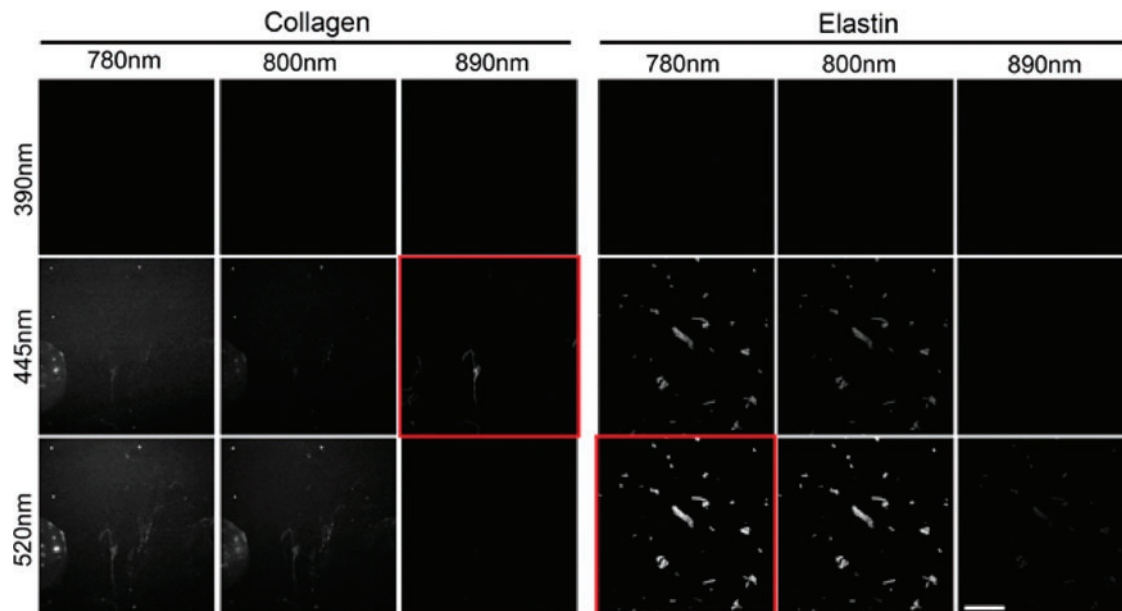

**SUPPLEMENTARY FIG. S1.** Excitation and emission wavelengths for detecting pure collagen or pure elastin crystals. Solutions of type I collagen (ColI) or elastin (Eln) were coated onto coverslips and imaged with multiphoton excitation using combinations of excitation and emission wavelengths. *Red boxes* indicate imaging parameters selected for this study for ColI and Eln. Scale bar= 100  $\mu$ m.
